# Supplementary material for: Widespread intronic polyadenylation diversifies immune cell transcriptomes
Source: PubMed Central journal article supplement (PMC5928244; doi:10.1038/s41467-018-04112-z), 2018-04-30
Supplement: 41467_2018_4112_MOESM3_ESM.pdf [file 41467_2018_4112_MOESM3_ESM.pdf]

## **Description of Additional Supplementary Files**

File Name: Supplementary Data 1

Description: IpA isoforms with significantly different usage of IpA site between NB cells vs other immune cell types and MM vs PC.
